# Supplementary material
Source: PubMed Central journal article supplement (PMC4749411)
Supplement: NIHMS731523-supplement-10822_2015_9877_MOESM1_ESM.pdf [file NIHMS731523-supplement-10822_2015_9877_MOESM1_ESM.pdf]

# Statistical Analysis of EGFR Structures' Performance in Virtual Screening

*Yan Li,<sup>\*,†,§</sup> Xiang Li,<sup>‡,§</sup> and Zigang Dong<sup>\*,†</sup>*

<sup>†</sup>The Hormel Institute, University of Minnesota, Austin Minnesota 55912, United States

<sup>‡</sup>Department of Physiology and Pathophysiology, School of Basic Medical Sciences, Zhengzhou University, 450001 Zhengzhou, Henan, China

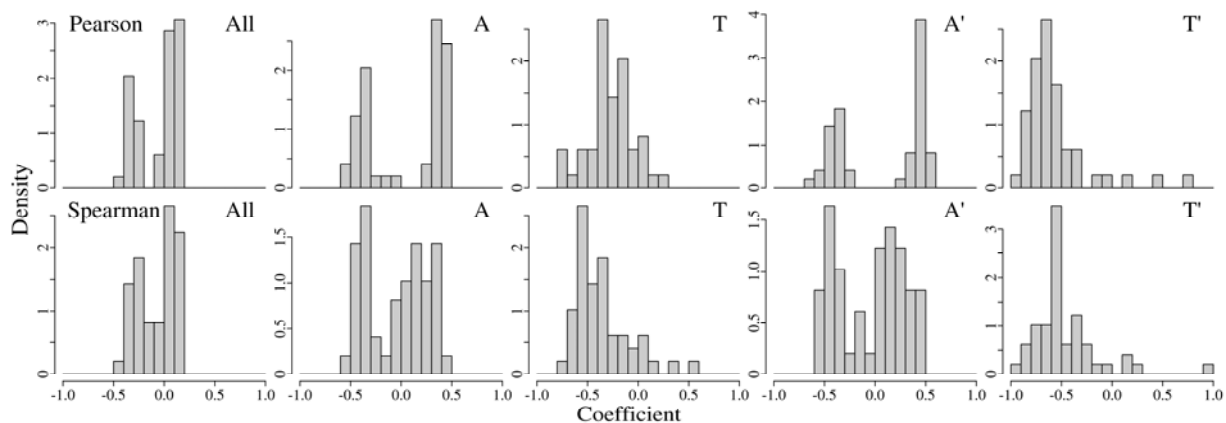

**Figure S1.** Distribution of coefficients between C $\alpha$  RMSD and EF with each EGFR structure as the template for five ensembles. The Pearson correlation coefficients are shown in the upper row. The Spearman correlation coefficients are displayed in the lower row.

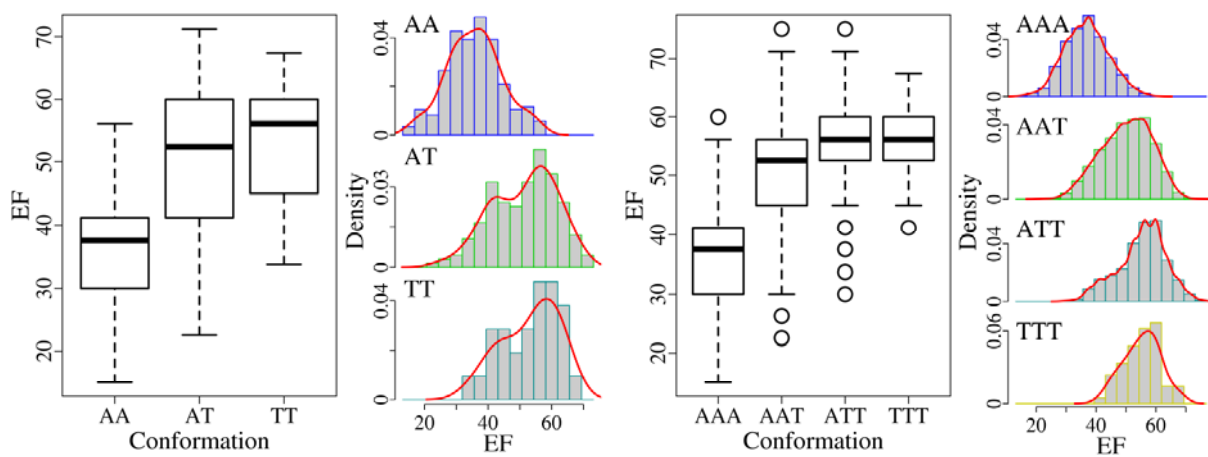

**Figure S2.** Discernment of two and three EGFR structures in virtual screening with the average score as the ligand score.

A

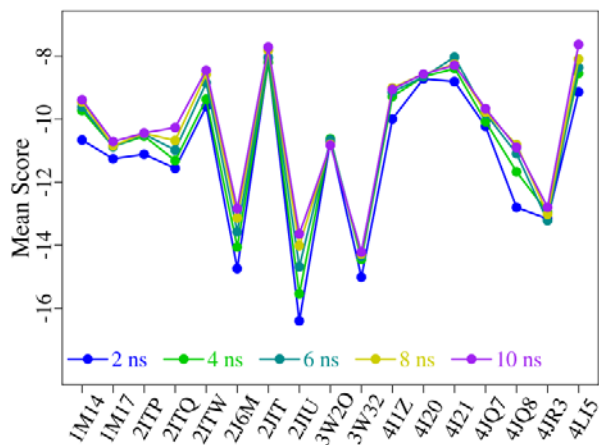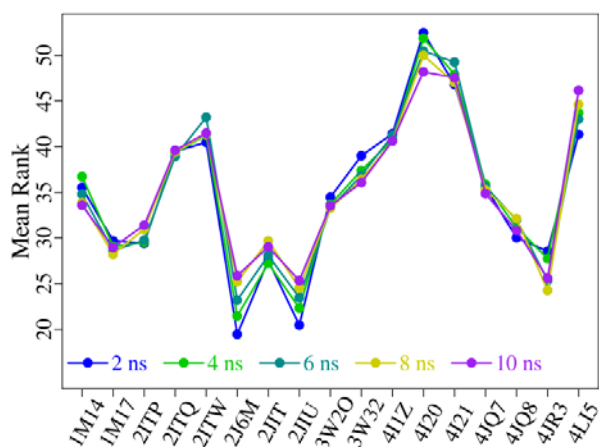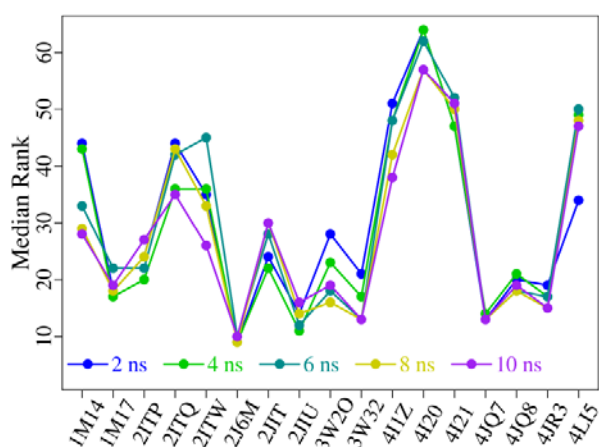

B

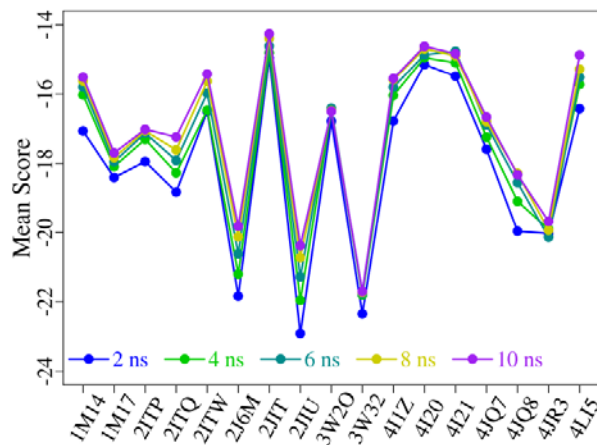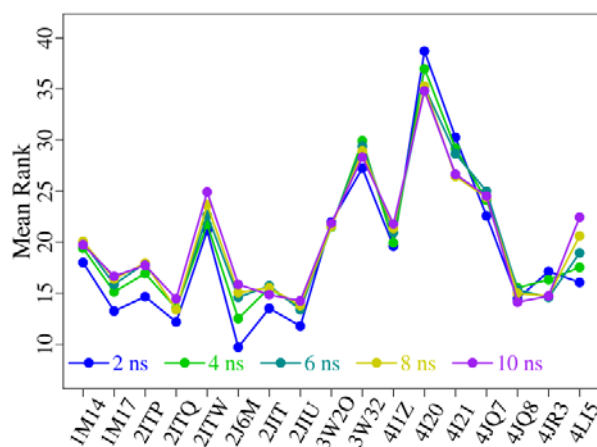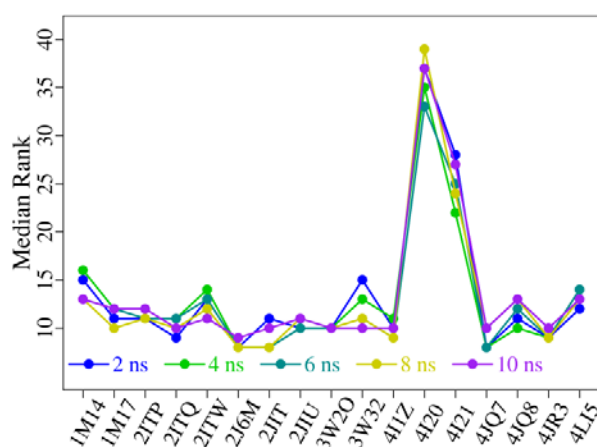

**Figure S3.** Effect of simulation length on the mean score, mean rank, and median rank of the 15 EGFR inhibitors in MM-PBSA. (A) The IDC is 2. (B) The IDC is 4.

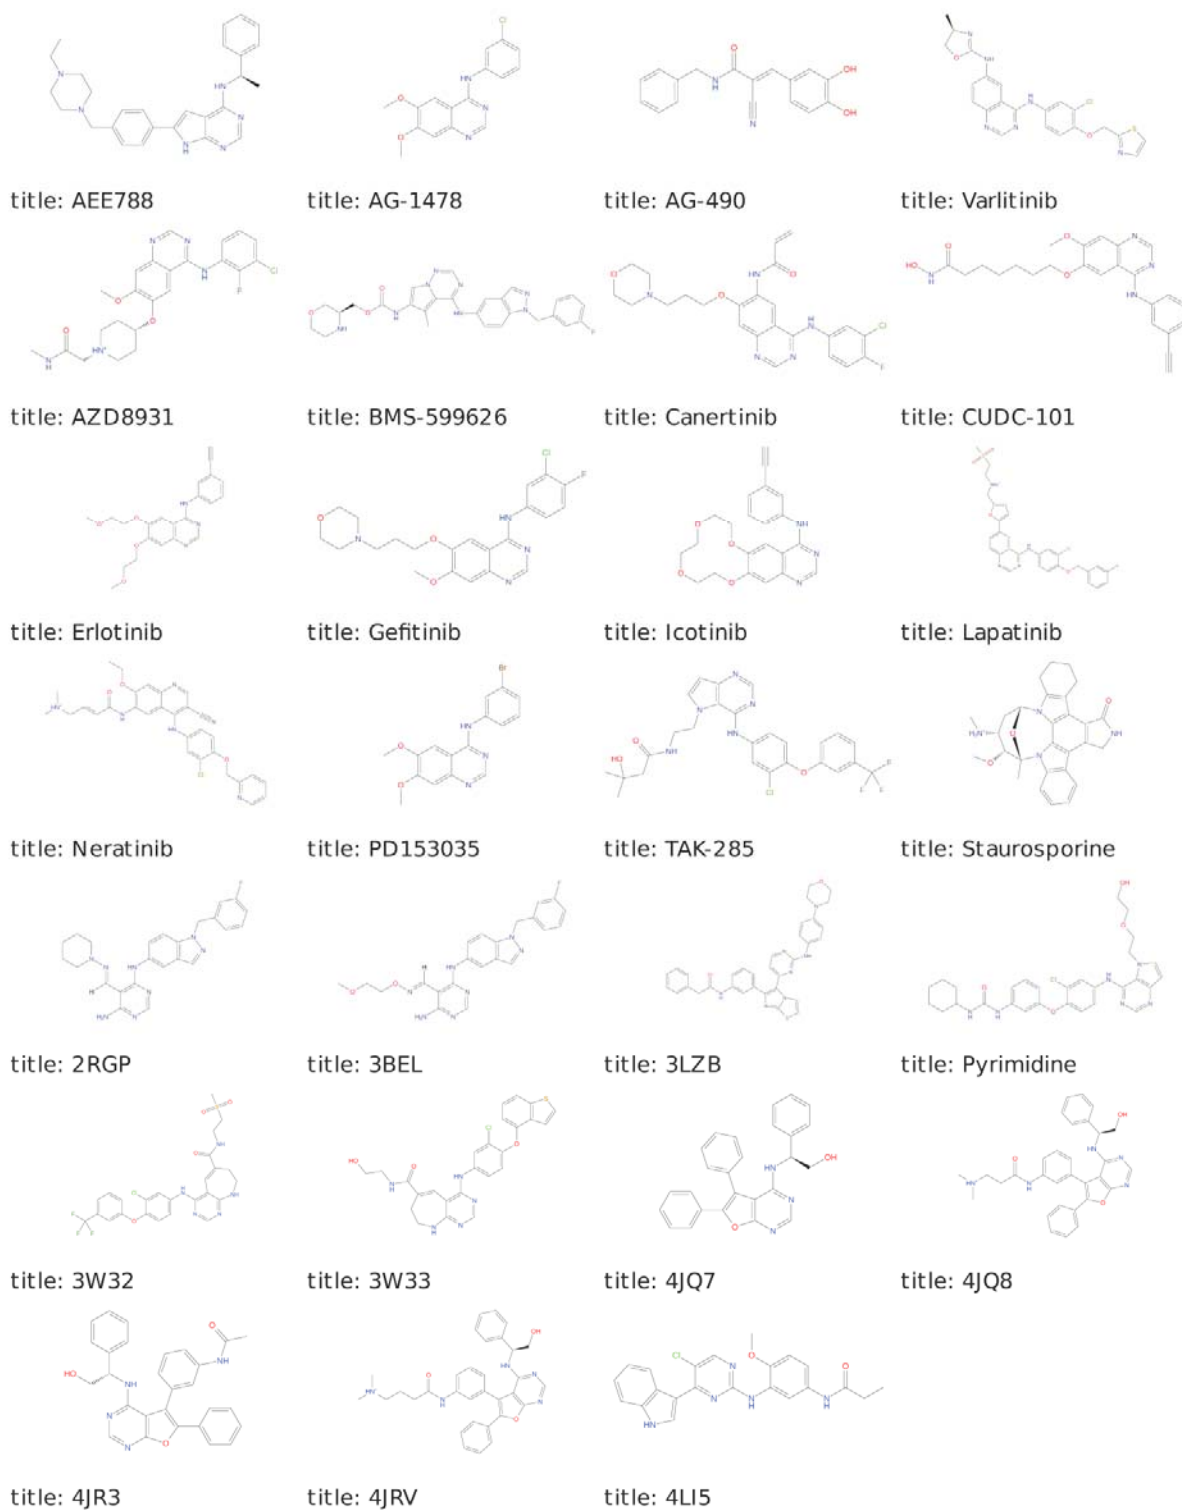

**Figure S4.** Chemical structures of 27 known EGFR inhibitors.

**Table S1.** The hypothesis testing results between two ensembles of EGFR structures calculated by T-test and Wilcoxon test as well as the mean EF with the standard deviation.

| Ensemble 1      |      |             | Ensemble 2      |      |             | T-test         |        |                 | Wilcoxon test  |       |
|-----------------|------|-------------|-----------------|------|-------------|----------------|--------|-----------------|----------------|-------|
|                 | size | EF          |                 | size | EF          | p <sup>1</sup> | t      | DF <sup>2</sup> | p <sup>1</sup> | W     |
| N               | 11   | 11.24±9.49  | O               | 30   | 36.35±13.40 | 0              | -6.671 | 25.314          | 0              | 20.5  |
| N               | 11   | 11.24±9.49  | P               | 8    | 21.07±8.72  | 0.033          | -2.339 | 15.958          | 0.05           | 20    |
| O               | 30   | 36.35±13.40 | P               | 8    | 21.07±8.72  | 0.001          | 3.879  | 16.964          | 0.003          | 204   |
| P               | 8    | 21.07±8.72  | N'              | 7    | 14.99±9.44  | 0.22           | 1.291  | 12.385          | 0.265          | 38    |
| A               | 33   | 28.05±11.75 | T               | 12   | 36.53±20.55 | 0.198          | -1.353 | 13.701          | 0.106          | 135   |
| A               | 33   | 28.05±11.75 | I               | 4    | 4.67±5.61   | 0              | 6.736  | 6.86            | 0.002          | 128   |
| T               | 12   | 36.53±20.55 | I               | 4    | 4.67±5.61   | 0              | 4.855  | 13.916          | 0.017          | 44    |
| A'              | 22   | 32.19±11.49 | T'              | 8    | 47.79±12.00 | 0.008          | -3.185 | 12.005          | 0.007          | 31    |
| W               | 22   | 32.87±14.86 | M               | 27   | 24.42±16.05 | 0.062          | 1.91   | 46.187          | 0.102          | 378.5 |
| W'              | 17   | 37.47±13.07 | M'              | 13   | 34.88±14.22 | 0.613          | 0.513  | 24.753          | 0.949          | 108.5 |
| WA <sup>3</sup> | 11   | 30.31±6.16  | MA <sup>4</sup> | 11   | 34.06±15.22 | 0.461          | -0.758 | 13.187          | 0.243          | 42.5  |
| WT <sup>5</sup> | 6    | 50.60±12.28 | MT <sup>6</sup> | 2    | 39.35±7.99  | 0.238          | 1.49   | 2.841           | 0.396          | 9     |

<sup>1</sup> p: p-value

<sup>2</sup> DF: degree of freedom

<sup>3,4</sup> WA and MA: wild type (W) and mutated (M) EGFR structures adopting the active conformation (A) bound with an organic compound

<sup>5,6</sup> WT and MT: wild type (W) and mutated (M) EGFR structures adopting the Src-like inactive conformation (T) bound with an organic compound

**Table S2.** The Pearson and Spearman correlation coefficients between the RMSD distance of EGFR structures and EF for five ensembles.

| Ensemble | Size | Pearson        |         |        |    | Spearman       |         |          |
|----------|------|----------------|---------|--------|----|----------------|---------|----------|
|          |      | r <sub>p</sub> | p-value | t      | DF | r <sub>s</sub> | p-value | S        |
| All      | 49   | -0.045         | 0.757   | -0.311 | 47 | -0.077         | 0.6     | 21103.19 |
| A        | 33   | 0.392          | 0.024   | 2.374  | 31 | 0.183          | 0.309   | 4890.827 |
| T        | 12   | -0.558         | 0.06    | -2.125 | 10 | -0.658         | 0.02    | 474.319  |
| A'       | 22   | 0.437          | 0.042   | 2.17   | 20 | 0.055          | 0.809   | 1674.405 |
| T'       | 8    | -0.92          | 0.001   | -5.763 | 6  | -0.909         | 0.002   | 160.376  |

**Table S3.** The Pearson and Spearman correlation coefficients between the EF and ligand properties for three ensembles of EGFR structures.

| Ensemble | Size | Property | Pearson        |         |        |    | Spearman       |         |          |
|----------|------|----------|----------------|---------|--------|----|----------------|---------|----------|
|          |      |          | r <sub>p</sub> | p-value | t      | DF | r <sub>s</sub> | p-value | S        |
| A'+T'    | 30   | MW       | 0.119          | 0.53    | 0.636  | 28 | 0.063          | 0.743   | 4213.961 |
|          |      | AlogP    | 0.166          | 0.38    | 0.892  | 28 | 0.171          | 0.366   | 3725.198 |
|          |      | SA       | 0.174          | 0.356   | 0.938  | 28 | 0.134          | 0.481   | 3894.229 |
|          |      | HSA      | 0.389          | 0.033   | 2.236  | 28 | 0.276          | 0.14    | 3254.763 |
| A'       | 22   | MW       | 0.163          | 0.469   | 0.738  | 20 | 0.088          | 0.697   | 1615.411 |
|          |      | AlogP    | 0.329          | 0.135   | 1.557  | 20 | 0.225          | 0.313   | 1372.015 |
|          |      | SA       | 0.489          | 0.021   | 2.507  | 20 | 0.429          | 0.046   | 1010.516 |
|          |      | HAS      | 0.512          | 0.015   | 2.665  | 20 | 0.475          | 0.026   | 930.411  |
| T'       | 8    | MW       | -0.184         | 0.664   | -0.457 | 6  | -0.279         | 0.504   | 107.422  |
|          |      | AlogP    | -0.456         | 0.257   | -1.254 | 6  | -0.352         | 0.393   | 113.532  |
|          |      | SA       | -0.253         | 0.545   | -0.641 | 6  | -0.376         | 0.359   | 115.569  |
|          |      | HSA      | 0.251          | 0.549   | 0.635  | 6  | 0.048          | 0.909   | 79.927   |

**Table S4.** The hypothesis testing results between ensembles of EGFR structures calculated from the lowest score and the average score as well as the mean EF with the standard deviation.

| Ensemble | Size | Lowest      | Average     | T-test |        |          | Wilcoxon test |           |
|----------|------|-------------|-------------|--------|--------|----------|---------------|-----------|
|          |      | EF          | EF          | p      | t      | DF       | p             | W         |
| AA       | 231  | 39.44±10.24 | 35.75±8.77  | 0      | 4.156  | 449.404  | 0             | 32296     |
| AT       | 176  | 56.76±11.75 | 51.22±10.37 | 0      | 4.691  | 344.659  | 0             | 20034.5   |
| TT       | 28   | 60.64±8.89  | 53.14±9.08  | 0.003  | 3.123  | 53.978   | 0.003         | 570       |
| AAA      | 1540 | 43.96±9.85  | 36.78±7.33  | 0      | 22.939 | 2843.6   | 0             | 1680961.5 |
| AAT      | 1848 | 60.33±11.02 | 50.15±8.45  | 0      | 31.533 | 3460.976 | 0             | 2644415.5 |
| ATT      | 616  | 65.76±7.55  | 55.23±7.98  | 0      | 23.785 | 1226.305 | 0             | 319131.5  |
| TTT      | 56   | 66.92±5.86  | 55.29±6.17  | 0      | 10.239 | 109.709  | 0             | 2854.5    |

**Table S5.** The hypothesis testing results in the two-structure and three-structure ensembles as well as the mean EF with the standard deviation.

| Ensemble 1 |      |             | Ensemble 2 |      |             | T-test |         |          | Wilcoxon |         |
|------------|------|-------------|------------|------|-------------|--------|---------|----------|----------|---------|
|            | size | EF          |            | size | EF          | p      | t       | DF       | p        | W       |
| AA         | 231  | 39.44±10.24 | AT         | 176  | 56.76±11.75 | 0      | -15.564 | 347.535  | 0        | 5965    |
| AA         | 231  | 39.44±10.24 | TT         | 28   | 60.64±8.89  | 0      | -11.709 | 36.257   | 0        | 437.5   |
| AT         | 176  | 56.76±11.75 | TT         | 28   | 60.64±8.89  | 0.047  | -2.046  | 43.552   | 0.15     | 2048    |
| AAA        | 1540 | 43.96±9.85  | AAT        | 1848 | 60.33±11.02 | 0      | -45.64  | 3369.265 | 0        | 420715  |
| AAA        | 1540 | 43.96±9.85  | ATT        | 616  | 65.76±7.55  | 0      | -55.268 | 1465.352 | 0        | 47470   |
| AAA        | 1540 | 43.96±9.85  | TTT        | 56   | 66.92±5.86  | 0      | -27.946 | 66.878   | 0        | 2501.5  |
| AAT        | 1848 | 60.33±11.02 | ATT        | 616  | 65.76±7.55  | 0      | -13.648 | 1538.841 | 0        | 409755  |
| AAT        | 1848 | 60.33±11.02 | TTT        | 56   | 66.92±5.86  | 0      | -8.005  | 67.411   | 0        | 33657   |
| ATT        | 616  | 65.76±7.55  | TTT        | 56   | 66.92±5.86  | 0.171  | -1.383  | 72.752   | 0.4      | 16096.5 |

**Table S6.** The hypothesis testing results between the best one-structure, two-structure, and three-structure ensembles as well as the mean EF with the standard deviation.

| Ensemble 1 |      |             | Ensemble 2 |      |             | T-test |        |         | Wilcoxon test |        |
|------------|------|-------------|------------|------|-------------|--------|--------|---------|---------------|--------|
|            | size | EF          |            | size | EF          | p      | t      | DF      | p             | W      |
| T'         | 8    | 47.79±12.00 | AT         | 176  | 56.76±11.75 | 0.074  | -2.07  | 7.623   | 0.039         | 401    |
| T'         | 8    | 47.79±12.00 | TT         | 28   | 60.64±8.89  | 0.019  | -2.818 | 9.312   | 0.01          | 44     |
| T'         | 8    | 47.79±12.00 | ATT        | 616  | 65.76±7.55  | 0.004  | -4.228 | 7.072   | 0             | 443    |
| T'         | 8    | 47.79±12.00 | TTT        | 56   | 66.92±5.86  | 0.003  | -4.437 | 7.484   | 0             | 31     |
| AT         | 176  | 56.76±11.75 | ATT        | 616  | 65.76±7.55  | 0      | -9.62  | 217.92  | 0             | 29328  |
| AT         | 176  | 56.76±11.75 | TTT        | 56   | 66.92±5.86  | 0      | -8.605 | 188.781 | 0             | 2333   |
| TT         | 28   | 60.64±8.89  | ATT        | 616  | 65.76±7.55  | 0.006  | -2.998 | 28.798  | 0.002         | 5634.5 |
| TT         | 28   | 60.64±8.89  | TTT        | 56   | 66.92±5.86  | 0.002  | -3.388 | 39.07   | 0.001         | 447    |

**Table S7.** The hypothesis testing results between ensembles of the active structures as well as the mean EF with the standard deviation.

| Ensemble 1 |      |             | Ensemble 2 |      |             | T-test |        |         | Wilcoxon test |        |
|------------|------|-------------|------------|------|-------------|--------|--------|---------|---------------|--------|
|            | size | EF          |            | size | EF          | p      | t      | DF      | p             | W      |
| A          | 22   | 32.19±11.49 | AA         | 231  | 39.44±10.24 | 0.009  | -2.855 | 24.282  | 0.003         | 1589.5 |
| A          | 22   | 32.19±11.49 | AAA        | 1540 | 43.96±9.85  | 0      | -4.781 | 21.443  | 0             | 7034.5 |
| AA         | 231  | 39.44±10.24 | AAA        | 1540 | 43.96±9.85  | 0      | -6.287 | 297.481 | 0             | 134129 |

**Table S8.** The mean Glide score of the top 1%, 2%, 10%, and all compounds with the standard deviation.

| <b>Structure</b> | <b>1%</b>    | <b>2%</b>    | <b>10%</b>   | <b>All</b>   |
|------------------|--------------|--------------|--------------|--------------|
| 1M14             | -7.699±0.302 | -7.470±0.315 | -6.884±0.365 | -5.396±0.888 |
| 1M17             | -8.255±0.536 | -7.979±0.469 | -7.361±0.407 | -5.809±0.937 |
| 1XKK             | -8.923±1.107 | -8.444±0.915 | -7.671±0.586 | -6.051±0.982 |
| 2EB2             | -8.022±0.265 | -7.810±0.285 | -7.244±0.351 | -5.629±0.974 |
| 2EB3             | -8.029±0.278 | -7.816±0.293 | -7.249±0.352 | -5.643±0.970 |
| 2GS2             | -7.576±0.277 | -7.368±0.288 | -6.805±0.349 | -5.315±0.890 |
| 2GS7             | -8.210±0.338 | -7.976±0.337 | -7.387±0.368 | -5.775±0.970 |
| 2ITN             | -8.141±0.253 | -7.936±0.275 | -7.365±0.349 | -5.784±0.968 |
| 2ITO             | -8.119±0.570 | -7.842±0.489 | -7.219±0.411 | -5.718±0.907 |
| 2ITP             | -8.106±0.460 | -7.856±0.410 | -7.258±0.389 | -5.730±0.915 |
| 2ITQ             | -8.348±0.295 | -8.126±0.308 | -7.564±0.354 | -5.927±1.003 |
| 2ITT             | -8.207±0.634 | -7.910±0.537 | -7.229±0.447 | -5.670±0.925 |
| 2ITU             | -8.061±0.219 | -7.867±0.252 | -7.317±0.339 | -5.644±1.026 |
| 2ITV             | -7.902±0.223 | -7.716±0.246 | -7.198±0.327 | -5.620±0.955 |
| 2ITW             | -7.902±0.207 | -7.726±0.233 | -7.202±0.321 | -5.642±0.947 |
| 2ITX             | -8.148±0.262 | -7.945±0.277 | -7.390±0.347 | -5.751±0.985 |
| 2ITY             | -8.000±0.567 | -7.711±0.494 | -7.090±0.412 | -5.598±0.894 |
| 2ITZ             | -8.257±0.554 | -7.966±0.487 | -7.325±0.426 | -5.751±0.957 |
| 2J6M             | -8.074±0.497 | -7.852±0.415 | -7.277±0.379 | -5.752±0.913 |
| 2JIT             | -6.653±0.191 | -6.492±0.213 | -6.064±0.264 | -4.926±0.759 |
| 2JIU             | -8.488±0.694 | -8.169±0.584 | -7.486±0.460 | -5.881±0.956 |
| 2RF9             | -6.576±0.196 | -6.410±0.219 | -5.961±0.274 | -4.827±0.722 |
| 2RFD             | -8.048±0.248 | -7.841±0.273 | -7.296±0.339 | -5.689±0.977 |
| 2RFE             | -7.968±0.266 | -7.745±0.296 | -7.148±0.362 | -5.632±0.909 |
| 2RGP             | -8.861±0.752 | -8.486±0.650 | -7.772±0.488 | -6.155±0.991 |
| 3BEL             | -8.948±1.125 | -8.500±0.909 | -7.729±0.582 | -6.127±0.982 |
| 3GT8             | -8.584±0.393 | -8.309±0.392 | -7.654±0.411 | -5.999±1.002 |
| 3LZB             | -8.446±0.515 | -8.135±0.479 | -7.488±0.414 | -6.065±0.894 |
| 3POZ             | -8.918±1.064 | -8.547±0.836 | -7.848±0.534 | -6.221±1.019 |
| 3UG1             | -7.992±0.233 | -7.793±0.263 | -7.144±0.397 | -5.509±0.969 |
| 3UG2             | -7.987±0.255 | -7.790±0.268 | -7.262±0.330 | -5.656±0.980 |
| 3VJN             | -7.789±0.273 | -7.577±0.290 | -7.034±0.334 | -5.505±0.941 |
| 3VJO             | -7.747±0.264 | -7.518±0.299 | -6.924±0.367 | -5.326±0.945 |
| 3W2O             | -8.150±0.246 | -7.953±0.266 | -7.387±0.352 | -5.724±1.008 |
| 3W2R             | -8.655±0.337 | -8.398±0.352 | -7.773±0.388 | -6.039±1.050 |
| 3W2S             | -8.718±0.356 | -8.455±0.369 | -7.774±0.418 | -6.070±1.026 |
| 3W32             | -9.184±1.106 | -8.812±0.862 | -8.096±0.553 | -6.460±1.027 |
| 3W33             | -8.891±1.190 | -8.504±0.922 | -7.794±0.567 | -6.176±1.000 |
| 4HJO             | -8.741±0.393 | -8.457±0.399 | -7.800±0.414 | -6.045±1.063 |
| 4IIZ             | -7.889±0.288 | -7.669±0.303 | -7.070±0.370 | -5.547±0.911 |
| 4I20             | -7.166±0.348 | -6.925±0.348 | -6.320±0.375 | -5.064±0.769 |



|      |              |              |              |              |
|------|--------------|--------------|--------------|--------------|
| 4I21 | -8.332±0.305 | -8.048±0.361 | -7.304±0.456 | -5.545±1.000 |
| 4I22 | -8.947±0.530 | -8.659±0.473 | -7.997±0.428 | -6.249±1.065 |
| 4I23 | -8.349±0.340 | -8.115±0.338 | -7.489±0.388 | -5.854±0.978 |
| 4JQ7 | -8.157±0.588 | -7.877±0.502 | -7.237±0.427 | -5.732±0.900 |
| 4JQ8 | -8.352±0.643 | -8.050±0.545 | -7.397±0.438 | -5.766±0.968 |
| 4JR3 | -8.112±0.545 | -7.817±0.485 | -7.145±0.432 | -5.610±0.905 |
| 4JRV | -8.300±0.636 | -8.040±0.518 | -7.419±0.424 | -5.758±0.998 |
| 4LI5 | -8.336±0.292 | -8.117±0.304 | -7.524±0.370 | -5.761±1.059 |
